# Supplementary material
Source: publisher figshare collection journal article supplement (https://tandf.figshare.com/articles/dataset/_/21571348)

**Primer Start Size TM GC% ‘C’s Sequence**

**Region #1: F1/R1**

**Region #1: Distal promoter: putative ZFX binding site hg19[Chr5: 141,707,000-141,708,500]**


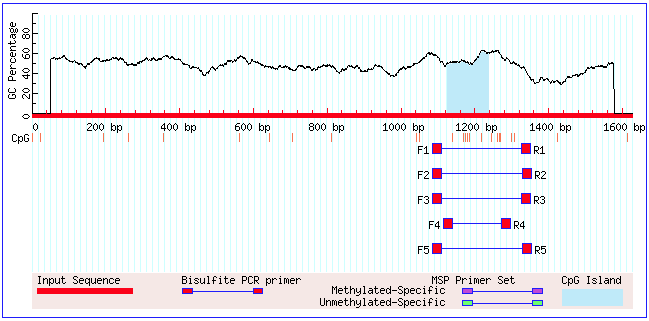

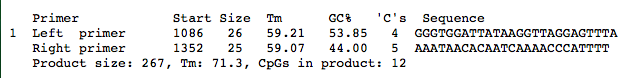


**Supplementary Figure 1. MethPrimer: Bisulfite Primer Design For *SPRY4***

**Primer Start Size TM GC% ‘C’s Sequence**

**Region #2: F5/R5**

**Region #2: Distal promoter: putative ZFX binding site hg19[Chr5: 141,705,750-141,707,000]**


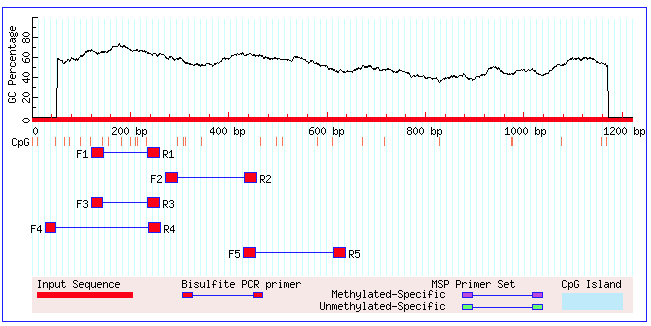

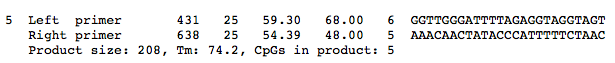


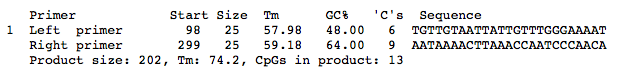


**Primer Start Size TM GC% ‘C’s Sequence**

**Region #3: F1/R1**

**Region #3: Proximal promoter CpG island: hg19[Chr5: 141,704,500-141,705,000]**


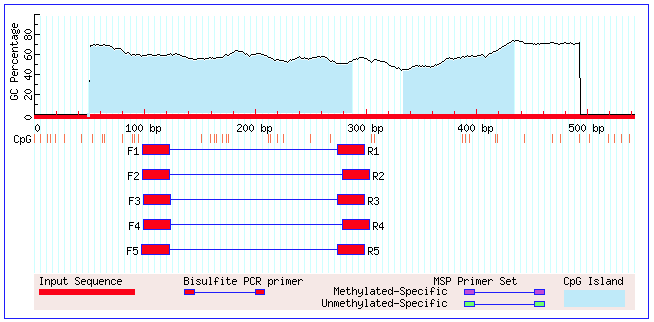

Supplement: Supplementary file 1 [file 1]
